# Supplementary material for: Exploring coinage bonding interactions in [Au(CN)4]− assemblies with silver and zinc complexes: a structural and theoretical study
Source: Royal Society of Chemistry journal article supplement (doi:10.1039/d4cp04818k), 2025-01-01
Supplement: d4cp04818k1.pdf [file d4cp04818k1.pdf]

## Electronic supplementary file

### Exploring Coinage Bonding Interactions in $[\text{Au}(\text{CN})_4]^-$ Assemblies with Silver and Zinc Complexes: A Structural and Theoretical Study

Alessia Giordana,<sup>a</sup> Emanuele Priola,<sup>\*a</sup> Ghodrat Mahmoudi,<sup>\*b,c,d</sup> Esmail Doustkhah<sup>c</sup>, Rosa M. Gomila<sup>e</sup> Ennio Zangrando<sup>f</sup>, Eliano Diana,<sup>a</sup> Lorenza Operti<sup>a</sup> and Antonio Frontera<sup>\*e</sup>

*a.* Department of Chemistry and NIS Centre, University of Turin, Via Pietro Giuria 7, 10125 Torino, Italy

*b.* Department of Chemistry, Faculty of Science, University of Maragheh, P.O. Box 55136-83111, Maragheh, Iran.

*c.* Chemistry Department, Faculty of Engineering and Natural Sciences, Istinye University, Sariyer, Istanbul 34396, Turkey

*d.* Department of Technical Sciences, Western Caspian University, Baku 1001, Azerbaijan

*e.* Department of Chemistry, Universitat de les Illes Balears, Crta de Valldemossa km 7.5, 07122 Palma de Mallorca, Spain.

*f.* Department of Chemical and Pharmaceutical Sciences, University of Trieste, Via L. Giorgieri 1, 34127 Trieste, Italy

#### Table of contents:

1. Table S1
2. Figure S1
3. Cartesian coordinates

## 1. Table S1

**Table S1.** Crystallographic Data and Details of Refinements for complexes **1 - 4**.

|                                                       | <b>1</b>                                                                        | <b>2</b>                                                           | <b>3</b>                                                           | <b>4</b>                                                                          |
|-------------------------------------------------------|---------------------------------------------------------------------------------|--------------------------------------------------------------------|--------------------------------------------------------------------|-----------------------------------------------------------------------------------|
| empirical formula                                     | C <sub>34</sub> H <sub>18</sub> Ag <sub>2</sub> Au <sub>2</sub> N <sub>14</sub> | C <sub>38</sub> H <sub>24</sub> Au <sub>2</sub> N <sub>14</sub> Zn | C <sub>44</sub> H <sub>24</sub> Au <sub>2</sub> N <sub>14</sub> Zn | C <sub>23</sub> H <sub>17</sub> Au <sub>2</sub> N <sub>11</sub> O <sub>3</sub> Zn |
| fw                                                    | 1232.30                                                                         | 1136.01                                                            | 1208.07                                                            | 954.78                                                                            |
| crystal system                                        | Monoclinic                                                                      | Triclinic                                                          | Triclinic                                                          | Orthorhombic                                                                      |
| space group                                           | <i>P</i> 2 <sub>1</sub> / <i>c</i>                                              | <i>P</i> $\bar{1}$                                                 | <i>P</i> $\bar{1}$                                                 | <i>P</i> bcn                                                                      |
| <i>a</i> (Å)                                          | 9.4843(7)                                                                       | 8.9756(3)                                                          | 11.2779(5)                                                         | 27.7951(10)                                                                       |
| <i>b</i> (Å)                                          | 8.6630(9)                                                                       | 11.2053(2)                                                         | 11.4229(4)                                                         | 19.2710(7)                                                                        |
| <i>c</i> (Å)                                          | 20.9623(14)                                                                     | 41.1536(9)                                                         | 16.8703(7)                                                         | 7.8649(2)                                                                         |
| <i>a</i> (°)                                          | 90                                                                              | 84.0567(17)                                                        | 77.701(3)                                                          | 90                                                                                |
| <i>β</i> (°)                                          | 99.890(7)                                                                       | 88.165(2)                                                          | 79.358(4)                                                          | 90                                                                                |
| <i>γ</i> (°)                                          | 90                                                                              | 80.659(2)                                                          | 83.815(3)                                                          | 90                                                                                |
| <i>V</i> (Å <sup>3</sup> )                            | 1696.7(2)                                                                       | 4061.69(17)                                                        | 2081.65(14)                                                        | 4212.8(2)                                                                         |
| <i>Z</i>                                              | 2                                                                               | 4                                                                  | 2                                                                  | 4                                                                                 |
| <i>D</i> <sub>calcd</sub> (mg/m <sup>3</sup> )        | 2.412                                                                           | 1.858                                                              | 1.927                                                              | 1.505                                                                             |
| <i>μ</i> (Mo-Kα) (mm <sup>-1</sup> )                  | 25.424                                                                          | 14.373                                                             | 14.074                                                             | 13.766                                                                            |
| <i>F</i> (000)                                        | 1144                                                                            | 2152                                                               | 1148                                                               | 1776                                                                              |
| <i>θ</i> range (°)                                    | 4.28 - 67.62                                                                    | 3.24 - 67.00                                                       | 2.72 - 66.77                                                       | 2.79 - 66.84                                                                      |
| Collected reflections                                 | 9666                                                                            | 58197                                                              | 16409                                                              | 12823                                                                             |
| Independent reflections                               | 2899                                                                            | 14027                                                              | 6837                                                               | 3657                                                                              |
| <i>R</i> <sub>int</sub>                               | 0.0929                                                                          | 0.0503                                                             | 0.0439                                                             | 0.1323                                                                            |
| Observed refls <i>I</i> > 2σ( <i>I</i> )              | 2142                                                                            | 11815                                                              | 5795                                                               | 2492                                                                              |
| Parameters                                            | 235                                                                             | 992                                                                | 551                                                                | 183                                                                               |
| GOF on <i>F</i> <sup>2</sup>                          | 1.012                                                                           | 1.069                                                              | 1.042                                                              | 1.057                                                                             |
| <i>R</i> 1 ( <i>I</i> > 2σ( <i>I</i> )) <sup>a</sup>  | 0.0540                                                                          | 0.0357                                                             | 0.0310                                                             | 0.0666                                                                            |
| <i>wR</i> 2 ( <i>I</i> > 2σ( <i>I</i> )) <sup>a</sup> | 0.1176                                                                          | 0.0780                                                             | 0.0708                                                             | 0.1844                                                                            |
| residuals (e Å <sup>-3</sup> )                        | 1.826, -1.794                                                                   | 1.637, -1.758                                                      | 0.927, -0.809                                                      | 2.465, -2.617                                                                     |

<sup>a</sup>  $R1 = \sum ||F_o| - |F_c|| / \sum |F_o|$ ,  $wR2 = \sum w (F_o^2 - F_c^2)^2 / \sum w (F_o^2)^2 ]^{1/2}$

## 2. Figure S1

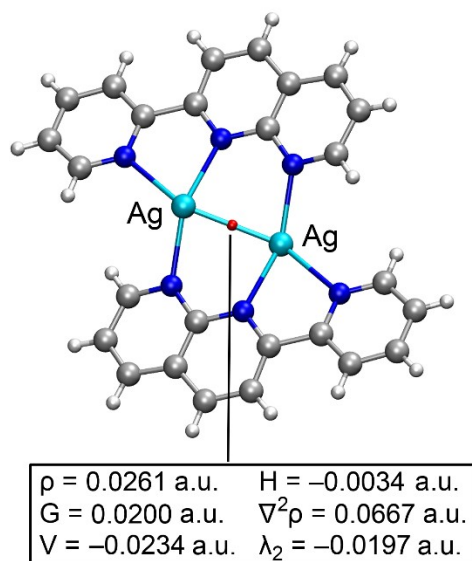

Fig. S1 QTAIM analysis of compound **1**. Only Ag...Ag BCP is shown as a red sphere.

## 2. Cartesian Coordinates

### Optimized dimers and trimers

#### Dimer T-shape

|    |            |           |            |
|----|------------|-----------|------------|
| Au | 7.2579695  | 2.5514463 | 3.8987006  |
| N  | 10.3978511 | 2.7502659 | 3.7617065  |
| N  | 7.4957105  | 0.1606345 | 5.9349320  |
| N  | 4.1194100  | 2.3068659 | 3.9778300  |
| N  | 7.0196112  | 4.8874913 | 1.8004392  |
| C  | 9.2487561  | 2.6778724 | 3.8126168  |
| C  | 7.4093848  | 1.0362878 | 5.1905623  |
| C  | 5.2680661  | 2.3964936 | 3.9498357  |
| C  | 7.1067030  | 4.0342057 | 2.5702447  |
| Au | 7.0625326  | 6.9413691 | 8.0666699  |
| N  | 3.9313799  | 6.6552612 | 8.2164074  |
| N  | 6.9323245  | 9.4077129 | 10.0173363 |
| N  | 10.1939507 | 7.2255582 | 7.9188696  |
| N  | 7.1932654  | 4.4774655 | 6.1148581  |
| C  | 5.0775873  | 6.7602671 | 8.1615763  |
| C  | 6.9798923  | 8.5051116 | 9.3025651  |
| C  | 9.0475749  | 7.1216581 | 7.9723082  |
| C  | 7.1453360  | 5.3784610 | 6.8303746  |

#### Antiparallel dimer

|    |           |            |            |
|----|-----------|------------|------------|
| Au | 4.4694027 | 6.6674168  | 19.1999962 |
| N  | 6.1957343 | 4.0869285  | 18.6781704 |
| N  | 5.0838106 | 6.4678274  | 22.2820356 |
| N  | 2.7579336 | 9.2552789  | 19.7334907 |
| N  | 3.8596662 | 6.8783136  | 16.1200238 |
| C  | 5.5618318 | 5.0299697  | 18.8692970 |
| C  | 4.8463110 | 6.5283912  | 21.1555132 |
| C  | 3.3802669 | 8.3060007  | 19.5356857 |
| C  | 4.0846260 | 6.8034918  | 17.2476843 |
| Au | 7.6420815 | 8.4902257  | 21.7277558 |
| N  | 5.9149149 | 11.0711124 | 22.2447937 |
| N  | 7.0291706 | 8.6859290  | 18.6451982 |
| N  | 9.3556601 | 5.9029947  | 21.1977233 |
| N  | 8.2527382 | 8.2855102  | 24.8080134 |
| C  | 6.5489597 | 10.1278711 | 22.0552112 |
| C  | 7.2661613 | 8.6263609  | 19.7718816 |
| C  | 8.7327347 | 6.8520721  | 21.3946700 |
| C  | 8.0270960 | 8.3581053  | 23.6803563 |

#### Trimer in Fig. 12 (left)

|    |            |           |            |
|----|------------|-----------|------------|
| Au | 7.2515016  | 2.4028093 | 3.8514274  |
| N  | 10.3924093 | 2.5941542 | 3.7182229  |
| N  | 7.4909381  | 0.1463596 | 6.0353833  |
| N  | 4.1108720  | 2.2076480 | 3.9853680  |
| N  | 7.0146828  | 4.6532181 | 1.6608654  |
| C  | 9.2428126  | 2.5254932 | 3.7660269  |
| C  | 7.4026527  | 0.9722293 | 5.2361898  |
| C  | 5.2602921  | 2.2788794 | 3.9371926  |
| C  | 7.1011777  | 3.8313559 | 2.4643173  |
| Au | 7.0621842  | 6.9544545 | 8.0733767  |
| N  | 3.9314125  | 6.6653246 | 8.2218378  |
| N  | 6.9292207  | 9.4115960 | 10.0365237 |
| N  | 10.1938111 | 7.2392365 | 7.9343232  |
| N  | 7.1986185  | 4.5035754 | 6.1044608  |
| C  | 5.0775206  | 6.7712729 | 8.1662217  |
| C  | 6.9774700  | 8.5122296 | 9.3177445  |
| C  | 9.0471853  | 7.1354233 | 7.9834157  |

|    |            |            |            |
|----|------------|------------|------------|
| C  | 7.1478254  | 5.3995178  | 6.8269026  |
| Au | 7.3545109  | -2.2318929 | -0.3012965 |
| N  | 10.4893275 | -2.0038028 | -0.4706759 |
| N  | 7.2748250  | 0.2718064  | 1.6035441  |
| N  | 4.2190154  | -2.4601061 | -0.1468156 |
| N  | 7.4328194  | -4.7429459 | -2.1978224 |
| C  | 9.3417730  | -2.0872780 | -0.4071639 |
| C  | 7.3036279  | -0.6435275 | 0.9044145  |
| C  | 5.3669777  | -2.3756567 | -0.2006615 |
| C  | 7.4049444  | -3.8233872 | -1.5039010 |

**Trimer in Fig. 12 (right)**

|    |            |            |            |
|----|------------|------------|------------|
| Au | 7.2505960  | 2.7443144  | 4.0837430  |
| N  | 10.3909497 | 2.9400454  | 3.9490608  |
| N  | 7.4887714  | 0.3803879  | 6.1509375  |
| N  | 4.1117157  | 2.4996608  | 4.1591472  |
| N  | 7.0160196  | 5.0513219  | 1.9532589  |
| C  | 9.2417105  | 2.8692008  | 3.9991608  |
| C  | 7.4012580  | 1.2460792  | 5.3951640  |
| C  | 5.2604250  | 2.5893111  | 4.1328667  |
| C  | 7.1014421  | 4.2090342  | 2.7352988  |
| Au | 7.0263293  | 7.1621597  | 8.2090558  |
| N  | 3.8953388  | 6.8641159  | 8.3389839  |
| N  | 6.8758673  | 9.6571123  | 10.1191432 |
| N  | 10.1579406 | 7.4491620  | 8.0743866  |
| N  | 7.1820104  | 4.6772043  | 6.2872191  |
| C  | 5.0413808  | 6.9743158  | 8.2923225  |
| C  | 6.9308321  | 8.7429316  | 9.4211275  |
| C  | 9.0114151  | 7.3457170  | 8.1243884  |
| C  | 7.1237410  | 5.5848934  | 6.9933349  |
| Au | 6.7820991  | 11.6775474 | 12.2487435 |
| N  | 9.9209645  | 11.9187466 | 12.1706830 |
| N  | 6.5457137  | 14.0272741 | 10.1654329 |
| N  | 3.6417052  | 11.4919140 | 12.3891387 |
| N  | 7.0154575  | 9.3760798  | 14.3855961 |
| C  | 8.7721706  | 11.8304476 | 12.1972457 |
| C  | 6.6322758  | 13.1666246 | 10.9270696 |
| C  | 4.7911453  | 11.5573167 | 12.3365508 |
| C  | 6.9305619  | 10.2184123 | 13.6035922 |
